# Supplementary material for: Lignocellulose-converting enzyme activity profiles correlate with molecular systematics and phylogeny grouping in the incoherent genus Phlebia (Polyporales, Basidiomycota)
Source: PubMed Central journal article supplement (PMC4610053; doi:10.1186/s12866-015-0538-x), 2015-10-19
Supplement: 12866_2015_538_MOESM1_ESM.pdf [file 12866_2015_538_MOESM1_ESM.pdf]

**Table S1.** Morphological and sequence based identification of isolates and sequenced specimens used in this study.

| FBCC number | Morphological identification | Sequence based identification | Molecular identification | Highest identities of nBLAST <sup>b</sup> | Max identity (%) (BLAST) | New name of the isolate | ITS+ LSU  | <i>gapdh</i> | <i>rpb2</i> |
|-------------|------------------------------|-------------------------------|--------------------------|-------------------------------------------|--------------------------|-------------------------|-----------|--------------|-------------|
| 4           | <i>Phlebia radiata</i>       | <i>Phlebia acerina</i>        | ITS <sup>a</sup>         | <i>Phlebia acerina</i> (AB210080)         | 99.4                     | <i>Phlebia acerina</i>  | LN611 082 | LN611 042    | LN611 995   |
| 345         | <i>Phlebia radiata</i>       | <i>Phlebia acerina</i>        | ITS                      | <i>Phlebia acerina</i> (AB210080)         | 99.5                     | <i>Phlebia acerina</i>  | LN611 083 | LN611 043    | LN610 996   |
| 464         | <i>Phlebia</i> sp.           | <i>Phlebia</i> sp.            | ITS                      | <i>Phlebia rufa</i> (HQ153428)            | 99                       |                         | LN611 084 | LN611 044    | LN610 997   |
| 43          | <i>Phlebia radiata</i>       | <i>Phlebia radiata</i>        | ITS                      | <i>Phlebia radiata</i> (AY854087)         | 99.8                     |                         | LN611 085 | LN611 045    | LN610 998   |
| 125         | <i>Phlebia radiata</i>       | <i>Phlebia radiata</i>        | ITS                      | <i>Phlebia radiata</i> (AY854087)         | 99.5                     |                         | LN611 086 | LN611 046    | LN610 999   |
| 149         | <i>Phlebia radiata</i>       | <i>Phlebia radiata</i>        | ITS                      | <i>Phlebia radiata</i> (AY854087)         | 99.5                     |                         | LN611 087 | LN611 047    | LN611 000   |
| 179         | <i>Phlebia radiata</i>       | <i>Phlebia radiata</i>        | ITS                      | <i>Phlebia radiata</i> (AY854087)         | 99.7                     |                         | LN611 088 | LN611 048    | LN611 001   |
| 194         | <i>Phlebia radiata</i>       | <i>Phlebia radiata</i>        | ITS                      | <i>Phlebia radiata</i> (AY854087)         | 99.7                     |                         | LN611 089 | LN611 049    | LN611 002   |
| 226         | <i>Phlebia radiata</i>       | <i>Phlebia radiata</i>        | ITS                      | <i>Phlebia radiata</i> (AY854087)         | 99.7                     |                         | LN611 090 | LN611 050    | LN611 003   |
| 279         | <i>Phlebia radiata</i>       | <i>Phlebia radiata</i>        | ITS                      | <i>Phlebia radiata</i> (AY854087)         | 99.7                     |                         | LN611 091 | LN611 051    | LN611 004   |
| 297         | <i>Phlebia rufa</i>          |                               | ITS                      | <i>Phlebia rufa</i> (KP135374)            | 100                      |                         | LN611 092 | LN611 052    | LN611 005   |
| 443         | <i>Phlebia radiata</i>       | <i>Phlebia radiata</i>        | ITS                      | <i>Phlebia radiata</i> (AY854087)         | 99.7                     |                         | LN611 093 | LN611 053    | LN611 006   |
| 444         | <i>Phlebia radiata</i>       | <i>Phlebia radiata</i>        | ITS                      | <i>Phlebia radiata</i> (AY854087)         | 99.7                     |                         | LN611 094 | LN611 054    | LN611 007   |
| 750         | <i>Phlebia radiata</i>       | <i>Phlebia radiata</i>        | ITS                      | <i>Phlebia radiata</i> (AY854087)         | 99.7                     |                         | LN611 095 | LN611 055    | LN611 008   |
| 790         | <i>Phlebia radiata</i>       | <i>Phlebia radiata</i>        | ITS                      | <i>Phlebia radiata</i> (AY854087)         | 99.7                     |                         | LN611 096 | LN611 056    | LN611 009   |
| 791         | <i>Phlebia radiata</i>       | <i>Phlebia radiata</i>        | ITS                      | <i>Phlebia radiata</i> (AY854087)         | 99.7                     |                         | LN611 097 | LN611 057    | LN611 010   |
| 792         | <i>Phlebia radiata</i>       | <i>Phlebia radiata</i>        | ITS                      | <i>Phlebia radiata</i> (AY854087)         | 99.7                     |                         | LN611 098 | LN611 058    | LN611 011   |
| 794         | <i>Phlebia radiata</i>       | <i>Phlebia radiata</i>        | ITS                      | <i>Phlebia radiata</i> (AY854087)         | 99.7                     |                         | LN611 099 | LN651 204    |             |

**Table S1.** Continued.

| FBCC number | Morphological identification | Sequence based identification | Molecular identification | Highest identities of nBLAST <sup>b</sup> | Max identity (%) (BLAST) | New name of the isolate   | ITS+ LSU  | <i>gapdh</i> | <i>rpb2</i> |
|-------------|------------------------------|-------------------------------|--------------------------|-------------------------------------------|--------------------------|---------------------------|-----------|--------------|-------------|
| 1374        | <i>Phlebia radiata</i>       | <i>Phlebia radiata</i>        | ITS                      | <i>Phlebia radiata</i> (AY854087)         | 99.4                     |                           | LN611 100 | LN611 059    | LN611 012   |
| 1375        | <i>Phlebia radiata</i>       | <i>Phlebia radiata</i>        | ITS                      | <i>Phlebia radiata</i> (AY854087)         | 99.7                     |                           | LN611 101 | LN611 060    | LN611 013   |
| 1376        | <i>Phlebia radiata</i>       | <i>Phlebia radiata</i>        | ITS                      | <i>Phlebia radiata</i> (AY854087)         | 99.7                     |                           | LN611 102 | LN611 061    | LN611 014   |
| 1377        | <i>Phlebia radiata</i>       | <i>Phlebia radiata</i>        | ITS                      | <i>Phlebia radiata</i> (AY854087)         | 99.7                     |                           | LN611 103 | LN611 062    | LN611 015   |
| 195         | <i>Phlebia centrifuga</i>    | <i>Phlebia centrifuga</i>     | ITS                      | <i>Phlebia centrifuga</i> (L43380)        | 99.5                     |                           | LN611 104 | LN651 206    | LN611 016   |
| 207         | <i>Phlebia centrifuga</i>    | <i>Phlebia centrifuga</i>     | ITS                      | <i>Phlebia centrifuga</i> (L43380)        | 99.5                     |                           | LN611 105 | LN651 205    | LN611 017   |
| 213         | <i>Phlebia centrifuga</i>    | <i>Phlebia centrifuga</i>     | ITS                      | <i>Phlebia centrifuga</i> (L43380)        | 99.5                     |                           | LN611 106 | LN611 063    | LN611 018   |
| 359         | <i>Phlebia centrifuga</i>    | <i>Phlebia centrifuga</i>     | ITS                      | <i>Phlebia centrifuga</i> (L43380)        | 99.7                     |                           | LN611 107 | LN651 207    | LN611 019   |
| 421         | <i>Phlebia albida</i>        | <i>Phlebia centrifuga</i>     | ITS                      | <i>Phlebia centrifuga</i> (JQ358815)      | 99                       | <i>Phlebia centrifuga</i> | LN611 108 | LN611 064    |             |
| 692         | <i>Phlebia centrifuga</i>    | <i>Phlebia centrifuga</i>     | ITS                      | <i>Phlebia centrifuga</i> (L43380)        | 99.5                     |                           | LN611 109 | LN651 208    | LN611 020   |
| 947         | <i>Phlebia centrifuga</i>    | <i>Phlebia centrifuga</i>     | ITS                      | <i>Phlebia centrifuga</i> (L43380)        | 99.5                     |                           | LN611 110 | LN651 209    | LN611 021   |
| 1252        | <i>Phlebia centrifuga</i>    | <i>Phlebia centrifuga</i>     | ITS                      | <i>Phlebia centrifuga</i> (JQ358815)      | 99                       |                           | LN611 111 | LN651 211    | LN611 022   |
| 1253        | <i>Phlebia centrifuga</i>    | <i>Phlebia centrifuga</i>     | ITS                      | <i>Phlebia centrifuga</i> (JQ358815)      | 99                       |                           | LN611 112 | LN651 212    | LN611 023   |
| 1264        | <i>Phlebia centrifuga</i>    | <i>Phlebia centrifuga</i>     | ITS                      | <i>Phlebia centrifuga</i> (JQ358815)      | 99                       |                           | LN611 113 | LN651 210    | LN611 024   |
| 307         | <i>Phlebia chrysocreas</i>   | <i>Phlebia chrysocreas</i>    | ITS                      | <i>Phlebia chrysocreas</i> (HQ153411)     | 92                       |                           | LN611 114 | LN611 065    | LN611 025   |
| 309         | <i>Phlebia chrysocreas</i>   | <i>Phlebia chrysocreas</i>    | ITS                      | <i>Phlebia chrysocreas</i> (HQ153411)     | 92                       |                           | LN611 115 | LN611 066    | LN611 026   |
| 295         | <i>Phlebia ochraceofulva</i> |                               | LSU                      | <i>Phlebia subochracea</i> (EU118656)     | 96                       |                           | LN611 116 | LN651 202    | LN611 027   |

**Table S1.** Continued

| FBCC number                                 | Morphological identification | Sequence based identification | Molecular identification | Highest identities of nBLAST <sup>b</sup> | Max identity (%) (BLAST) | New name of the isolate                | ITS+ LSU     | <i>gapdh</i> | <i>rpb2</i>  |
|---------------------------------------------|------------------------------|-------------------------------|--------------------------|-------------------------------------------|--------------------------|----------------------------------------|--------------|--------------|--------------|
| 360                                         | <i>Phlebia ochraceofulva</i> |                               | LSU                      | <i>Phlebia subochracea</i> (EU118656)     | 96                       |                                        | LN6111<br>17 | LN651<br>203 | LN611<br>028 |
| 422                                         | <i>Phlebia hydnoides</i>     | <i>Scopuloides hydnoides</i>  | ITS                      | <i>Scopuloides hydnoides</i> (EU118665)   | 99                       | <i>Scopuloides (Phlebia) hydnoides</i> | LN6111<br>18 | LN611<br>067 | LN611<br>029 |
| 423                                         | <i>Phlebia hydnoides</i>     | <i>Scopuloides hydnoides</i>  | ITS                      | <i>Scopuloides hydnoides</i> (EU118665)   | 98.4                     | <i>Scopuloides (Phlebia) hydnoides</i> | LN6111<br>19 | LN611<br>068 | LN611<br>030 |
| 426                                         | <i>Phlebia ochraceofulva</i> | <i>Phlebia subserialis</i>    | ITS                      | <i>Phlebia subserialis</i> (FJ791134)     | 99.8                     | <i>Phlebia subserialis</i>             | LN6111<br>20 |              |              |
| 427                                         | <i>Phlebia subserialis</i>   |                               | LSU                      | <i>Rhizochaete filamentosa</i> (AY219393) | 97                       | <i>Phlebia</i> sp.                     | LN6111<br>21 | LN611<br>069 | LN611<br>031 |
| 937                                         | <i>Phlebia livida</i>        | <i>Phlebia livida</i>         | ITS                      | <i>Phlebia livida</i> (HQ153414)          | 99.3                     |                                        | LN6111<br>22 |              | LN611<br>032 |
| 1283                                        | <i>Phlebia livida</i>        | <i>Phlebia livida</i>         | ITS                      | <i>Phlebia livida</i> (HQ153414)          | 99.5                     |                                        | LN6111<br>23 |              | LN611<br>033 |
| 82                                          | <i>Phlebia tremellosa</i>    | <i>Phlebia tremellosa</i>     | ITS                      | <i>Phlebia tremellosa</i> (HM051073)      | 99                       |                                        | LN6111<br>24 | LN611<br>070 | LN611<br>034 |
| 91                                          | <i>Phlebia tremellosa</i>    | <i>Phlebia tremellosa</i>     | ITS                      | <i>Phlebia tremellosa</i> (HM051073)      | 99                       |                                        | LN6111<br>25 | LN611<br>071 |              |
| 278                                         | <i>Phlebia tremellosa</i>    | <i>Phlebia tremellosa</i>     | ITS                      | <i>Phlebia tremellosa</i> (HM051073)      | 98                       |                                        | LN6111<br>26 | LN611<br>072 | LN611<br>035 |
| 294                                         | <i>Phlebia tremellosa</i>    | <i>Phlebia tremellosa</i>     | ITS                      | <i>Phlebia tremellosa</i> (HM051073)      | 99                       |                                        | LN6111<br>27 | LN611<br>073 |              |
| 362                                         | <i>Phlebia tremellosa</i>    | <i>Phlebia tremellosa</i>     | ITS                      | <i>Phlebia tremellosa</i> (HM051073)      | 99                       |                                        | LN6111<br>28 | LN611<br>074 |              |
| 446                                         | <i>Phlebia tremellosa</i>    | <i>Phlebia tremellosa</i>     | ITS                      | <i>Phlebia tremellosa</i> (DQ384584)      | 99                       |                                        | LN6111<br>29 | LN611<br>075 | LN611<br>036 |
| Isolates included in the phylogenetic study |                              |                               |                          |                                           |                          |                                        |              |              |              |
| 296                                         | <i>Phlebia albida</i>        |                               | ITS                      | <i>Phanerochaete sordida</i> (FJ481018)   | 93                       | <i>Phlebia</i> sp.                     | LN6111<br>30 | LN611<br>076 | LN611<br>037 |
| 315                                         | <i>Phlebiopsis gigantea</i>  | <i>Phlebiopsis gigantea</i>   | ITS                      | <i>Phlebiopsis gigantea</i> (AF87485)     | 99.4                     |                                        | LN6111<br>31 | LN611<br>077 | LN611<br>038 |
| 316                                         | <i>Phlebiopsis gigantea</i>  | <i>Phlebiopsis gigantea</i>   | ITS                      | <i>Phlebiopsis gigantea</i> (AF87485)     | 99.4                     |                                        | LN6111<br>32 | LN611<br>078 | LN611<br>039 |

**Table S1.** Continued

| FBCC number | Morphological identification | Sequence based identification | Molecular identification | Highest identities of nBLAST <sup>b</sup> | Max identity (%) (BLAST) | New name of the isolate | ITS+ LSU     | <i>gapdh</i> | <i>rpb2</i>  |
|-------------|------------------------------|-------------------------------|--------------------------|-------------------------------------------|--------------------------|-------------------------|--------------|--------------|--------------|
| 318         | <i>Phlebiopsis gigantea</i>  | <i>Phlebiopsis gigantea</i>   | ITS                      | <i>Phlebiopsis gigantea</i> (AF87486)     | 99.4                     |                         | LN611<br>133 | LN611<br>079 | LN611<br>040 |
| 986         | <i>Phlebiopsis gigantea</i>  | <i>Phlebiopsis gigantea</i>   | ITS                      | <i>Phlebiopsis gigantea</i> (AF087487)    | 99.8                     |                         | LN611<br>134 | LN611<br>080 |              |
| 1463        | <i>Phlebia brevispora</i>    | <i>Phlebia brevispora</i>     | ITS                      | <i>Phlebia brevispora</i> (HM208154)      | 100                      |                         | LN611<br>135 | LN611<br>081 | LN611<br>041 |

<sup>a</sup>ITS1-5.8s-ITS2 gene region

<sup>b</sup>accession numbers in brackets
