# Supplementary material for: Lignocellulose-converting enzyme activity profiles correlate with molecular systematics and phylogeny grouping in the incoherent genus Phlebia (Polyporales, Basidiomycota)
Source: PubMed Central journal article supplement (PMC4610053; doi:10.1186/s12866-015-0538-x), 2015-10-19
Supplement: 12866_2015_538_MOESM6_ESM.pdf [file 12866_2015_538_MOESM6_ESM.pdf]

**Table S2.** Statistical tests of model effects and estimates of index parameter in Tweedie distribution.

| Laccase              |                 |       |
|----------------------|-----------------|-------|
|                      | Wald Chi-Square | Sig.  |
| Time                 | 59.483          | 0.000 |
| Group                | 102.478         | 0.000 |
| Time*Group           | 3656.442        | 0.000 |
| MnP                  |                 |       |
|                      | Wald Chi-Square | Sig.  |
| Time                 | 38.287          | 0.000 |
| Group                | 331.070         | 0.000 |
| Time*Group           | 9146.242        | 0.000 |
| CBH                  |                 |       |
|                      | Wald Chi-Square | Sig.  |
| Time                 | 59.483          | 0.000 |
| Group                | 102.478         | 0.000 |
| Time*Group           | 3656.442        | 0.000 |
| $\beta$ -glucosidase |                 |       |
|                      | Wald Chi-Square | Sig.  |
| Time                 | 59.483          | 0.000 |
| Group                | 102.478         | 0.000 |
| Time*Group           | 3656.442        | 0.000 |
| Endoglucanase        |                 |       |
|                      | Wald Chi-Square | Sig.  |
| Time                 | 59.483          | 0.000 |
| Group                | 102.478         | 0.000 |
| Time*Group           | 3656.442        | 0.000 |

| Enzyme               | Tweedie  |
|----------------------|----------|
| Laccase              | 1.677475 |
| MnP                  | 1.625354 |
| CBH                  | 1.445152 |
| $\beta$ -glucosidase | 1.438485 |
| Endoglucanase        | 1.482727 |
