# Supplementary material for: Lignocellulose-converting enzyme activity profiles correlate with molecular systematics and phylogeny grouping in the incoherent genus Phlebia (Polyporales, Basidiomycota)
Source: PubMed Central journal article supplement (PMC4610053; doi:10.1186/s12866-015-0538-x), 2015-10-19
Supplement: 12866_2015_538_MOESM7_ESM.pdf [file 12866_2015_538_MOESM7_ESM.pdf]

**Table S3.** Accessions for nucleotide and protein-coding gene model sequences used for comparison in the four-gene phylogenetic analyses. All the sequences were retrieved from JGI MycoCosm database [76] with minor exception: <sup>a</sup> from NCBI <http://www.ncbi.nlm.nih.gov/>

| Fungi                                                                                                    | SSU                                                                  | LSU                                                       | <i>gapdh</i>                                                   | <i>rpb2</i>                                             |
|----------------------------------------------------------------------------------------------------------|----------------------------------------------------------------------|-----------------------------------------------------------|----------------------------------------------------------------|---------------------------------------------------------|
| <i>Bjerkandera adusta</i><br>HHB-12826-SP SB-2                                                           | scaffold_11<br>6:11112-<br>11672                                     | scaffold_116:6<br>879-11111                               | jgi Bjead1_1 183636 estExt_Genemark1.C_140109                  | jgi Bjead1_1 163844 gm1.283_g                           |
| <i>Phanerochaete chrysosporium</i> RP-78 /<br><i>Phanerochaete chrysosporium</i> isolate<br>AFTOL-ID 776 | AY854086 <sup>a</sup>                                                | AF287883 <sup>a</sup>                                     | jgi Phchr1 132198 e_gww2.9.328.1                               | jgi Phchr1 7545 fgenesh1_pg.C_scaffold_13000333         |
| <i>Phanerochaete carnosa</i><br>HHB-10118-Sp                                                             | scaffold_28<br>:3285-3898                                            | scaffold_28:19<br>34-3284                                 | jgi Phaca1 261269 fgenesh2_kg.8_#_864_#_scaffold_160_3189_4734 | jgi Phaca1 247866 fgenesh2_kg.1_#_1876_#_isotig11261    |
| <i>Postia placenta</i> MAD-698-R-SB12                                                                    | scaffold_59<br>:2784-3397                                            | scaffold_59:33<br>98-4810                                 | jgi Posp1RSB12_1 1185348 estExt_Genewise1Plus.C_16_t10169      | jgi Posp1RSB12_1 175997 estExt_Genewise1Plus.C_1_t30126 |
| <i>Trametes versicolor</i> FP-101664 SS1                                                                 | scaffold_24<br>:1316-1883                                            | scaffold_24:1-<br>15649                                   | jgi Trave1 170525 estExt_Genewise1Plus.C_8_t20209              | jgi Trave1 110266 e_gw1.1.3121.1                        |
| <i>Ganoderma</i> sp. 10597<br>SS1                                                                        | scaffold_21<br>:13398-<br>13988                                      | scaffold_21:12<br>699-13397                               | jgi Gansp1 154547 gm1.7246_g                                   | jgi Gansp1 159732 estExt_Genemark1.C_1_t20266           |
| <i>Dichomitus squalens</i><br>LYAD-421 SS1                                                               | scaffold_16<br>8:626-1170<br>+<br>scaffold_16<br>2:4601-<br>5120     | scaffold_162:3<br>989-<br>4600/scaffold_<br>154:1265-1408 | jgi Dicsq1 183206 estExt_Genemark1.C_540047                    | jgi Dicsq1 164685 gm1.454_g                             |
| <i>Phlebia brevispora</i><br>HHB-7030 SS6                                                                | scaffold_97<br>:14645-<br>15148 +<br>scaffold_97<br>:17080-<br>17577 | scaffold_97:15<br>729-17079                               | jgi Phlbr1 163617 estExt_Genemark1.C_170071                    | jgi Phlbr1 159852 estExt_Genemark1.C_4_t10175           |
| <i>Heterobasidion irregulare</i> TC32-1                                                                  | scaffold_09<br>:1649857-<br>1650425                                  | scaffold_09:16<br>50426-1651779                           | jgi Hetan2 419475 fgenesh1_pm.07_#_336                         | jgi Hetan2 413386 fgenesh1_pm.01_#_528                  |
